# Supplementary material for: Bicyclic (alkyl)(amino)carbene stabilized zinc(0) complex with singlet biradicaloid ground state
Source: Royal Society of Chemistry journal article supplement (doi:10.1039/d1cc01298c), 2021-01-01
Supplement: d1cc01298c1.pdf [file d1cc01298c1.pdf]

## Electronic Supporting Information

### Bicyclic (alkyl)(amino)carbene stabilized zinc(0) complex with singlet biradicaloid ground state

*N. M. Rajendran,<sup>a</sup> Nimisha Gautam,<sup>a</sup> Pallavi Sarkar,<sup>b</sup> Jasimuddin Ahmed,<sup>a</sup> Arpan Das,<sup>a</sup>  
Shubhajit Das,<sup>b</sup> Swapan K. Pati,<sup>\*b</sup> Swadhin K. Mandal<sup>\*a</sup>*

<sup>a</sup>Department of Chemical Sciences, Indian Institute of Science Education and Research Kolkata, Mohanpur 741246, India; <sup>b</sup>Theoretical Sciences Unit, Jawaharlal Nehru Centre for Advanced Scientific Research, Bangalore 560064, India

| <b>Table of Contents</b>                                                                                              | <b>page</b> |
|-----------------------------------------------------------------------------------------------------------------------|-------------|
| Experimental Section                                                                                                  | S2-S4       |
| <sup>1</sup> H NMR and <sup>13</sup> C NMR spectrum of compound <b>1</b>                                              | S5          |
| <sup>1</sup> H NMR and <sup>13</sup> C NMR spectrum of compound <b>2</b>                                              | S6          |
| <sup>1</sup> H NMR spectrum of <b>2</b> after exposed with O <sub>2</sub> and photo of <b>2</b> in degassed water     | S7          |
| Stacked <sup>1</sup> H NMR spectra of <b>2</b> + H <sub>2</sub> O                                                     | S8          |
| <sup>1</sup> H NMR and <sup>13</sup> C NMR of <b>2</b> with H <sub>2</sub> gas (bubbling)                             | S9          |
| <sup>1</sup> H NMR of <b>2</b> with H <sub>2</sub> gas (100 bar) and <sup>1</sup> H NMR spectrum of compound <b>3</b> | S10         |
| <sup>13</sup> C NMR spectrum of compound <b>3</b> and <sup>1</sup> H NMR spectrum of compound <b>4</b>                | S11         |
| <sup>13</sup> C NMR spectrum of compound <b>4</b> and EPR spectrum of Ph <sub>3</sub> C·                              | S12         |
| HRMS spectrum of compound <b>4</b>                                                                                    | S13         |
| Crystallographic data for compounds <b>1</b> and <b>2</b>                                                             | S13-14      |
| XYZ coordinates for computed structures                                                                               | S15-S27     |
| References                                                                                                            | S27-S28     |

## Experimental Section

**General methods and instrumentation.** Manipulations involving air/moisture sensitive compounds were carried out under an argon atmosphere using a Schlenk line and a glovebox. Toluene and hexane (from Na/benzophenone ketyl) were distilled fresh whenever required. Benzene-*d*<sub>6</sub> and THF-*d*<sub>8</sub> were condensed from Na/benzophenone ketyl, and CDCl<sub>3</sub> and CD<sub>2</sub>Cl<sub>2</sub> were condensed from CaH<sub>2</sub> and stored in a glovebox. All other chemicals were purchased from Sigma-Aldrich and used as received. Elemental analyses were performed using a Perkin-Elmer 2400, Series II, CHNS/O analyser. NMR spectra were recorded on a JEOL ECS 400 MHz spectrometer and on a Bruker Avance III 500 MHz spectrometer. EPR measurements were performed on a Bruker (X-band) spectrometer. All chemical shifts were reported in ppm using tetramethylsilane as a reference.

**Single-Crystal X-ray Experiments.** X-ray diffraction data for complexes **1**, **2** and **3** were collected on a SuperNova, Dual, Mo at zero, Eos diffractometer. The data for complex **1** were collected at 293 K while for compounds **2** and **3** data were collected at 100 K. Atomic coordinates, isotropic and anisotropic displacement parameters of all the non-hydrogen atoms were refined using Olex2,<sup>S1</sup> and the structure was solved with the ShelXT<sup>S2</sup> structure solution program using Intrinsic Phasing and refined with the ShelXL<sup>S3</sup> refinement package using Least Squares minimization. Carbon and hydrogen atoms in bicyclo[2.2.2]octane framework (BICAAC ring) of compound **1** and **2** were disordered which were modelled using the occupancy factors with AFIX instructions. The crystal data and results of the analyses are listed in Table S1. CCDC 2033102 and 2033103, contain the supplementary crystallographic data for **1**, **2**, respectively. These data can be obtained free of charge from the Cambridge Crystallographic Data Centre via [www.ccdc.cam.ac.uk/data\\_request/cif](http://www.ccdc.cam.ac.uk/data_request/cif).

**Computational Details.** All geometry optimization are performed under the framework of Density functional theory. To confirm the comparison in energy among different electronic states three different functional M06-2X,<sup>S4,S5</sup> PBE0<sup>S6</sup> and B3LYP-D3<sup>S7-S13</sup> are used along with def2-SVP<sup>S14</sup> basis set for all atoms. The stationary points are characterized by vibrational analysis to recognize the structures as minima with all positive frequencies. The energies are further refined

with the larger basis set def2-TZVPP<sup>S15</sup> using geometries obtained from SVP basis set. All calculations are carried out with Gaussian 16 suite of program.<sup>S16</sup>

**Synthesis of [(BICAAC)( $\mu$ -Cl)ZnCl]<sub>2</sub> (1).** Toluene (20 mL) was cooled to  $-78$  °C and added to a 1:1 mixture of BICAAC (0.516 g, 1.66 mmol) and ZnCl<sub>2</sub> (0.225 g, 1.65). The reaction mixture was slowly warmed to room temperature and stirred for 12 h. The color of the reaction mixture changed to yellow from colorless, which was then filtered over a frit using celite and then solvent was reduced to 10 mL to afford colorless block shaped crystals suitable for single-crystal X-ray analysis of **1** at 25 °C. Yield: 0.545 g, 71%. Mp: 185-186 °C dec. <sup>1</sup>H NMR (CDCl<sub>3</sub>, 500 MHz, ppm):  $\delta$  7.27 (1H, t, ArH), 7.19-7.11 (2H, m, ArH), 2.77-2.70 (1H, m, CHMe<sub>2</sub>), 2.52-2.45 (1H, m, CHMe<sub>2</sub>), 1.87-1.84 (4H, m), 1.74-1.59 (4H, m), 1.51-1.47 (1H, m), 1.25 (6H, q, CHMeMe), 1.16 (6H, q, CHMeMe), 0.99 (3H, d, CH<sub>3</sub>), 0.96 (3H, s, CH<sub>3</sub>). <sup>13</sup>C NMR (CDCl<sub>3</sub>, 125 MHz, ppm):  $\delta$  144.1, 143.9, 139.5, 129.8, 129.1, 128.3, 125.3, 125.1, 65.1, 49.9, 44.0, 37.5, 32.9, 31.4, 28.9, 28.2, 25.8, 25.7, 25.0, 24.4, 24.0, 23.4, 21.5, 20.7. Elemental analysis, found (calcd) for C<sub>44</sub>H<sub>66</sub>Cl<sub>4</sub>N<sub>2</sub>Zn<sub>2</sub>: C, 58.85 (59.01); H, 7.16 (7.43); N, 2.95 (3.13).

**Synthesis of [(BICAAC)<sub>2</sub>Zn] (2).** Toluene (20 mL) was cooled to  $-78$  °C and added to a 1:3 mixture of [(BICAAC)( $\mu$ -Cl)ZnCl]<sub>2</sub> (0.500 g, 1.66 mmol) and KC<sub>8</sub> (0.440 g, 3.26 mmol). The reaction mixture was slowly warmed to room temperature and stirred for 3 h resulting in a deep blue solution. The reaction mixture was filtered over a frit using celite and filtrate was dried under vacuum for several hours to obtain a black colored solid. The crude material was recrystallized from hexane at 25 °C to obtain red colored crystals. Yield: 0.14 g, 52%. UV/vis  $\lambda_{ab}$  = 636 nm. <sup>1</sup>H NMR (C<sub>6</sub>D<sub>6</sub>, 400 MHz, ppm):  $\delta$  7.21 (1H, s, ArH), 7.10-7.08 (2H, d, ArH), 3.53-3.51 (1H, m, CHMe<sub>2</sub>), 3.35-3.32 (1H, m, CHMe<sub>2</sub>), 1.96 (1H, br), 1.78-1.74 (4H, m), 1.64-1.60 (6H, m), 1.51 (1H, br), 1.30-1.25 (6H, m), 1.18-1.16 (3H, m), 0.8 (1H, br), 0.67 (3H, d, CH<sub>3</sub>), 0.21 (3H, s, CH<sub>3</sub>). <sup>13</sup>C NMR (C<sub>6</sub>D<sub>6</sub>, 125 MHz, ppm):  $\delta$  149.9, 149.5, 143.8, 126.0, 125.7, 125.4, 55.7, 46.6, 43.5, 38.9, 37.4, 35.5, 28.7, 28.4, 28.1, 28.0, 25.3, 24.5, 24.4, 22.9, 19.8. Elemental analysis, found (calcd) for C<sub>44</sub>H<sub>66</sub>N<sub>2</sub>Zn: C, 76.15 (76.77); H, 10.09 (9.66); N, 4.31 (4.07).

**Synthesis of [(BICAAC)CO<sub>2</sub>] (3).** To a Schlenk tube containing (BICAAC)<sub>2</sub>Zn (**2**) (0.250 g, 1.52 mmol) in toluene (10 mL), purified CO<sub>2</sub> gas was condensed at  $-78$  °C and the solution was warmed to room temperature and stirred for 1 h, whereupon a precipitate was obtained by slow

evaporation of CO<sub>2</sub>, which was filtered using a frit, dried under vacuum. Single crystals for X-ray diffraction analysis were grown from a hexane-THF solution at -20 °C. Yield: 0.230 g, 91%. <sup>1</sup>H NMR (THF *d*<sub>8</sub> + C<sub>2</sub>D<sub>2</sub>Cl<sub>2</sub>, 400 MHz, ppm): δ 7.37 (1H, t, ArH), 7.19-7.11 (2H, m, ArH), 2.77-2.75 (1H, m, CHMe<sub>2</sub>), 2.56-2.53 (1H, m, CHMe<sub>2</sub>), 2.26-2.22 (1H, m), 2.07-2.05 (1H, m), 1.93-1.89 (2H, m), 1.80-1.79 (1H, m), 1.55-1.52 (1H, m), 1.34 (3H, s, CH<sub>3</sub>), 1.28-1.26 (6H, m, CHMeMe), 1.19-1.15 (6H, m, CHMeMe), 1.09 (3H, d, CH<sub>3</sub>), 0.96 (3H, s, CH<sub>3</sub>). NMR (THF *d*<sub>8</sub> + C<sub>2</sub>D<sub>2</sub>Cl<sub>2</sub>, 100 MHz, ppm): δ 194.4, 159.7, 145.6, 145.3, 134.6, 130.6, 129.4, 129.2, 128.9, 128.4, 125.5, 64.9, 43.7, 43.4, 37.6, 34.6, 33.1, 30.1, 29.9, 29.6, 22.4, 19.3, 19.2. Elemental analysis, found (calcd) for C<sub>23</sub>H<sub>34</sub>NO<sub>2</sub>: C, 77.18 (77.48); H, 9.35 (9.61); N, 4.05 (3.93).

**Reaction of [(BICAAC)<sub>2</sub>Zn] with Ph<sub>3</sub>CCl.** A 1:2 molar mixture of (BICAAC)<sub>2</sub>Zn (0.05 g, 0.07 mmol) and Ph<sub>3</sub>CCl (0.04 g, 0.14 mmol) was placed in a Schlenk flask and benzene (10 mL) was added at room temperature. The color of the solution immediately changed to the orange and resultant mixture was stirred for 1 h. It was filtered over a frit using celite and filtrate was dried under vacuum. Yield (filtrate): 0.03 g (crude), 88%. EPR measurement of the Ph<sub>3</sub>C<sup>•</sup> in toluene at 25 °C shows a sharp resonance at 3315 G. NMR measurement of precipitate (**4**): <sup>1</sup>H NMR (C<sub>6</sub>D<sub>6</sub>, 400 MHz, ppm): δ 9.41 (1H, s, imine-H) 7.53-7.50 (1H, m, ArH), 7.34-7.31 (2H, m, ArH), 2.68-2.65 (1H, m, CHMe<sub>2</sub>), 2.60-2.55 (1H, m, CHMe<sub>2</sub>), 2.37-2.34 (2H, m), 2.24-2.18 (2H, m), 1.95-1.90 (1H, m), 1.84-1.79 (1H, m), 1.70-1.66 (5H, m), 1.34(3H, d), 1.30-1.25 (6H, m), 1.21-1.20 (6H, m), 1.08 (3H, d). <sup>13</sup>C NMR (C<sub>6</sub>D<sub>6</sub>, 125 MHz, ppm): δ 194.4, 143.8, 143.2, 135.2, 131.7, 125.7, 125.3, 69.4, 45.5, 43.7, 38.6, 33.5, 33.2, 29.7, 29.1, 25.6, 25.5, 23.8, 22.8, 22.0, 20.8, 19.7. HRMS (ESI-TOF) m/z: [M - Cl]<sup>+</sup> calcd for C<sub>22</sub>H<sub>34</sub>ClN 312.2686, found 312.2646.

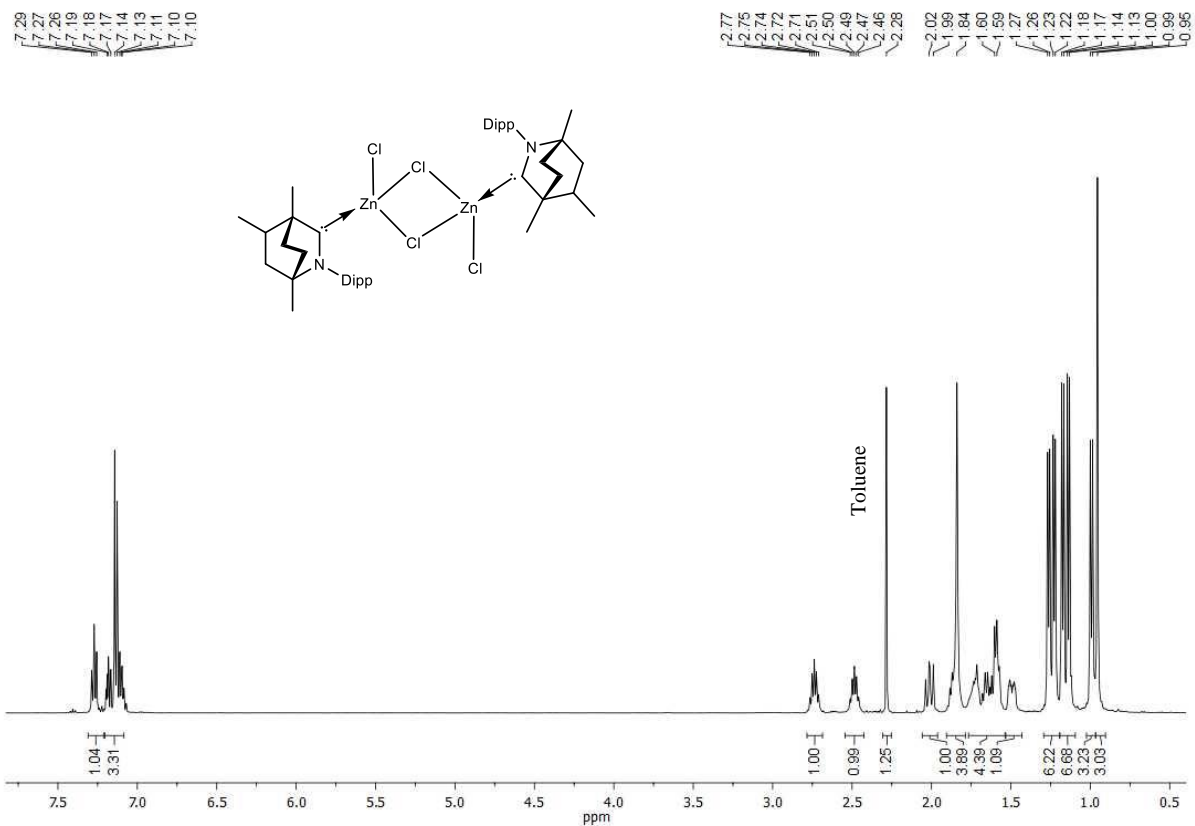

**Fig. S1** <sup>1</sup>H NMR spectrum of compound **1** in CDCl<sub>3</sub>

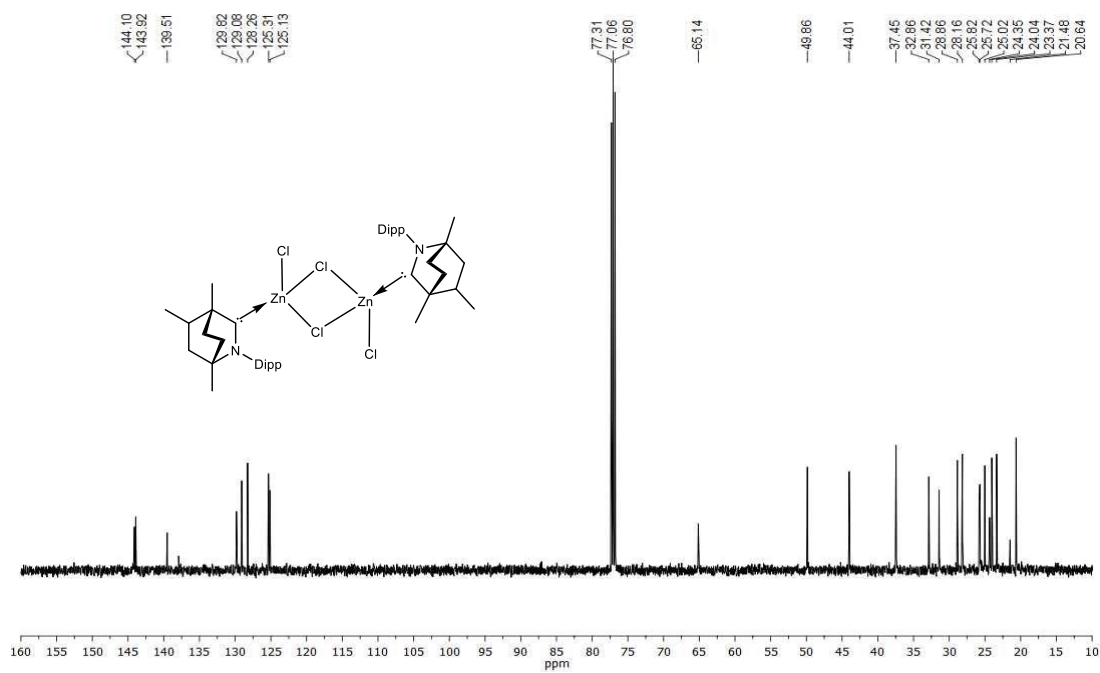

**Fig. S2** <sup>13</sup>C NMR spectrum of compound **1** in CDCl<sub>3</sub>

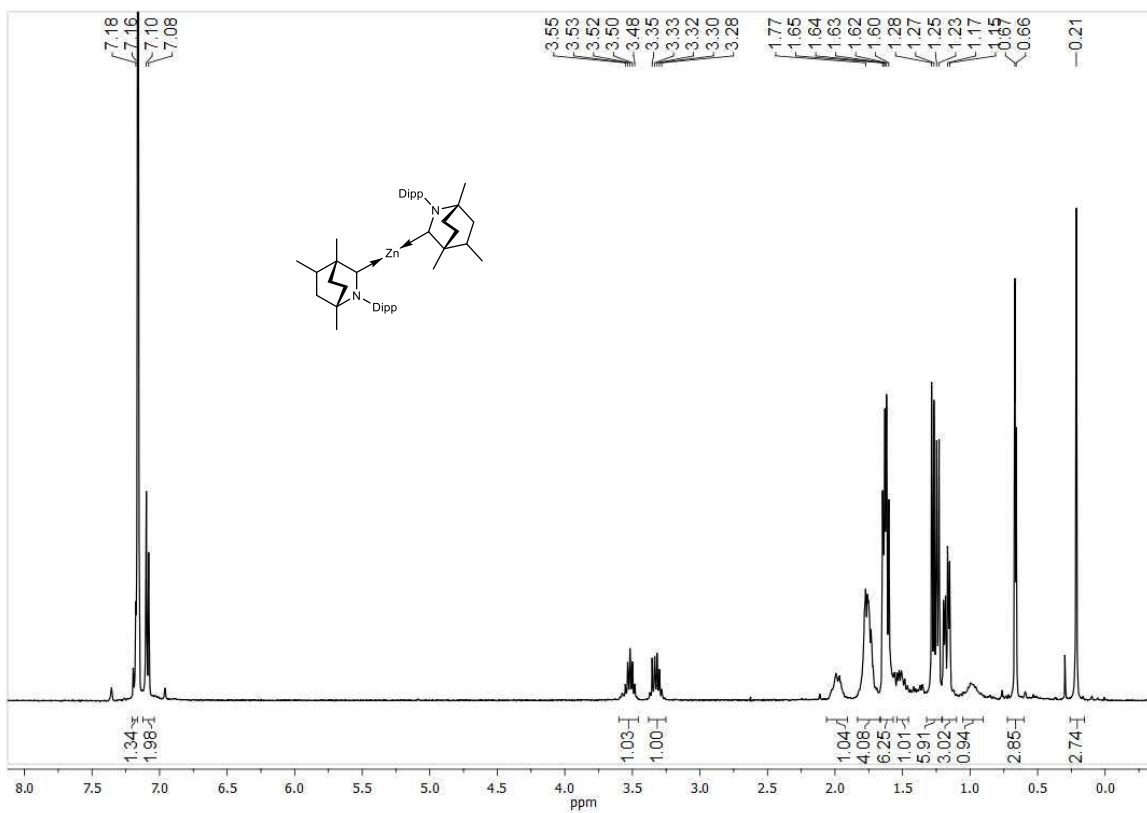

Fig. S3  $^1\text{H}$  NMR spectrum of compound **2** in  $\text{C}_6\text{D}_6$

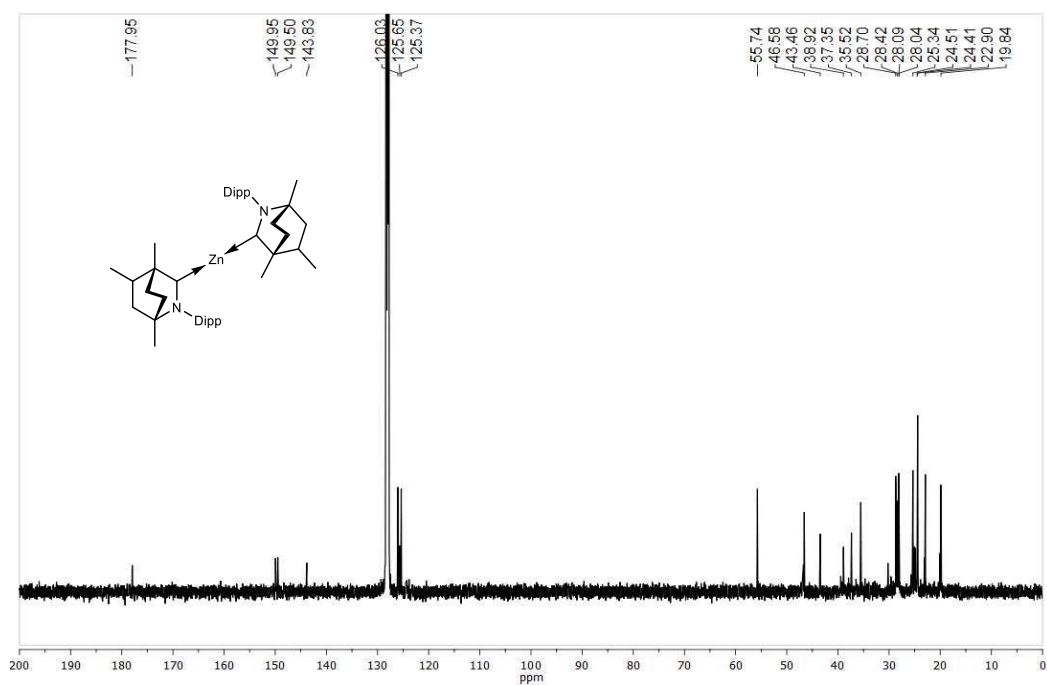

Fig. S4  $^{13}\text{C}$  NMR spectrum of compound **2** in  $\text{C}_6\text{D}_6$

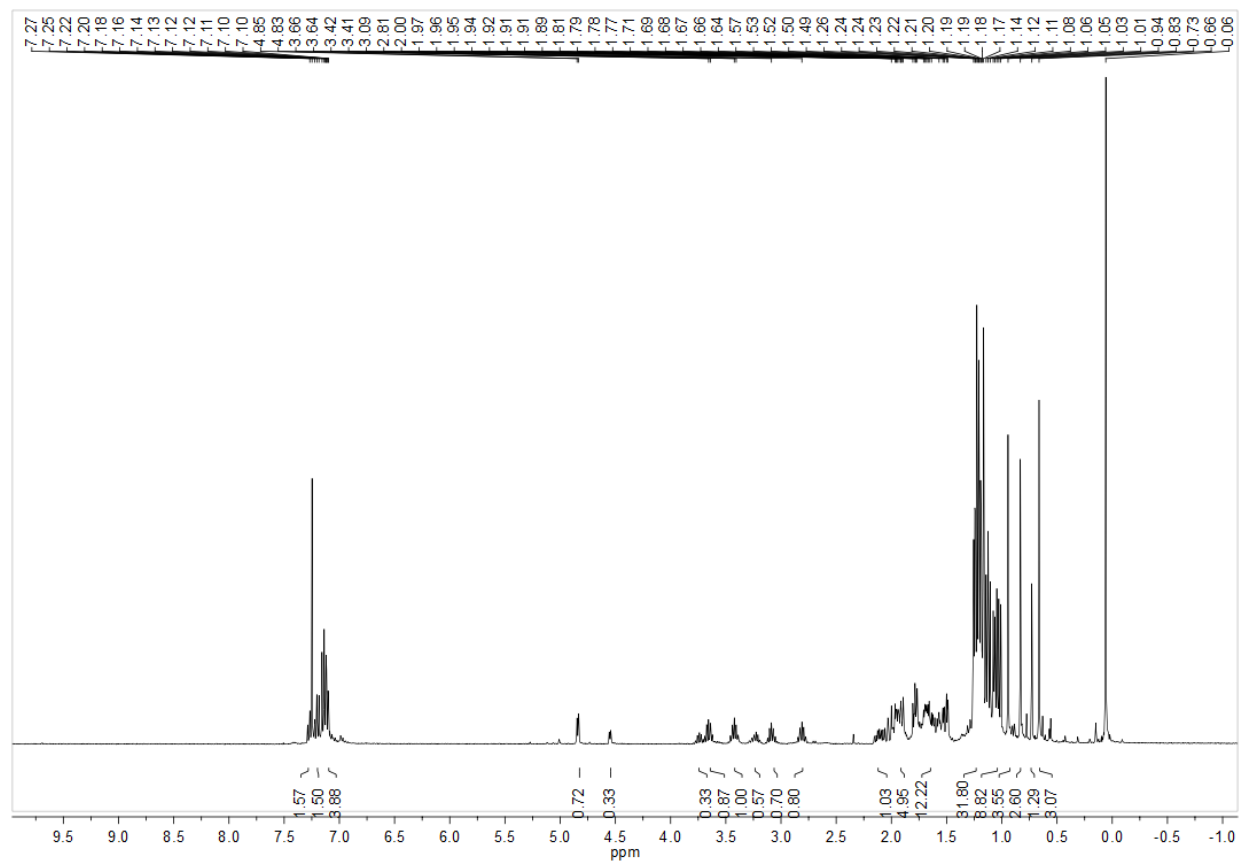

**Fig. S5**  $^1\text{H}$  NMR spectrum of compound **2** after exposed with oxygen in  $\text{CDCl}_3$

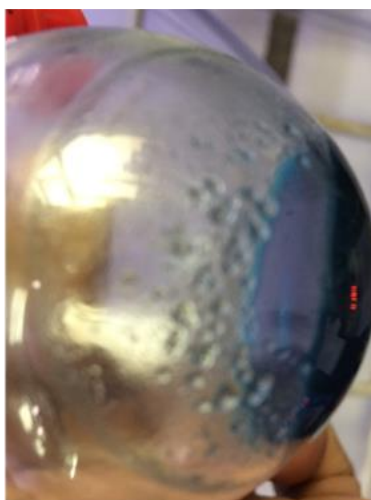

**Fig. S6** Photograph of  $(\text{BICAAC})_2\text{Zn}$  compound with degassed water.

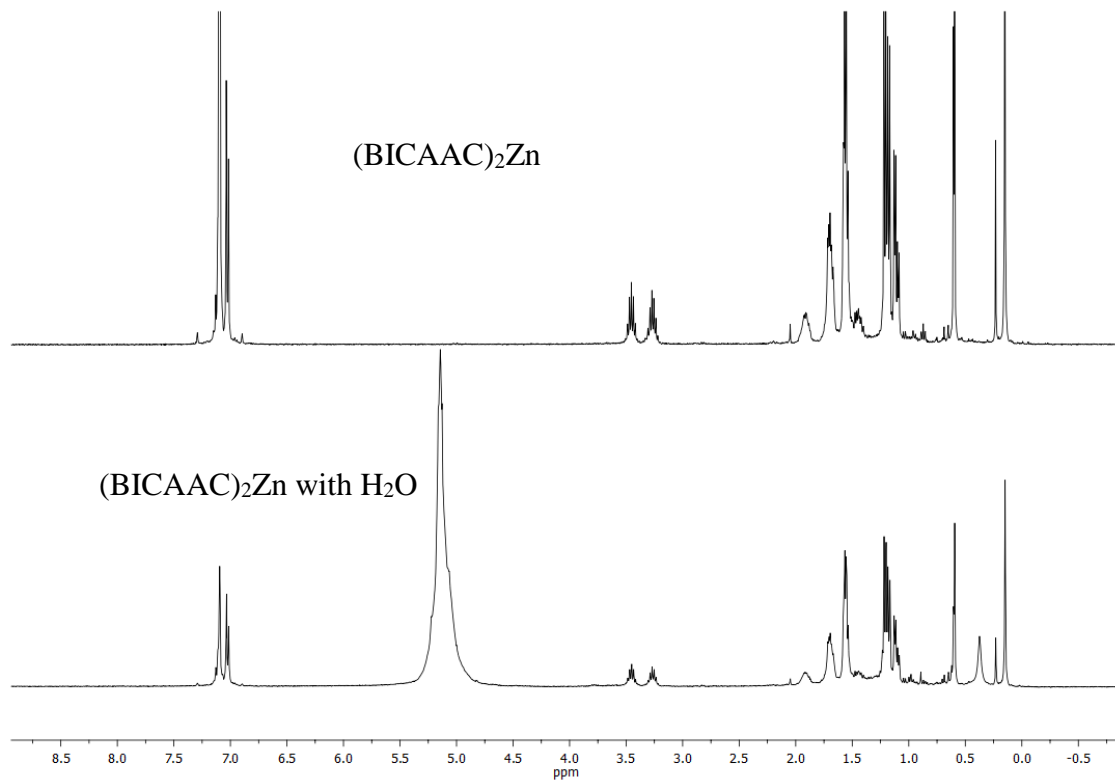

**Fig. S7** NMR tube reaction of (BICAAC)<sub>2</sub>Zn compound with degassed water, recorded in C<sub>6</sub>D<sub>6</sub>. The top spectrum represents the <sup>1</sup>H NMR spectrum of **2** without H<sub>2</sub>O treatment.



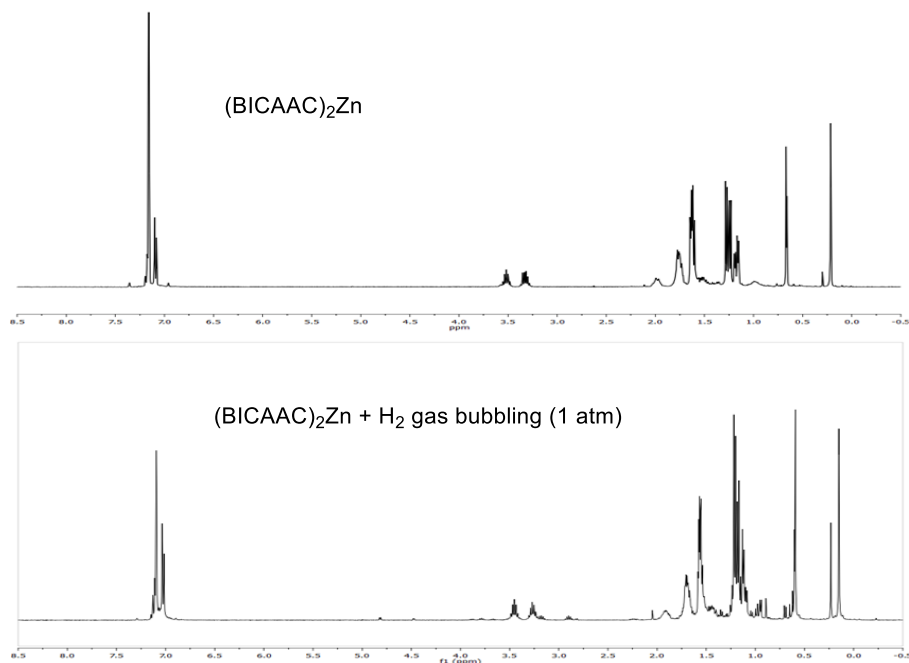

**Fig. S8**  $^1\text{H}$  NMR spectrum of compound **2** (without exposure to  $\text{H}_2$  shown in the top part) and bottom spectrum shown after exposure with  $\text{H}_2$  gas (bubbling), recorded in  $\text{C}_6\text{D}_6$

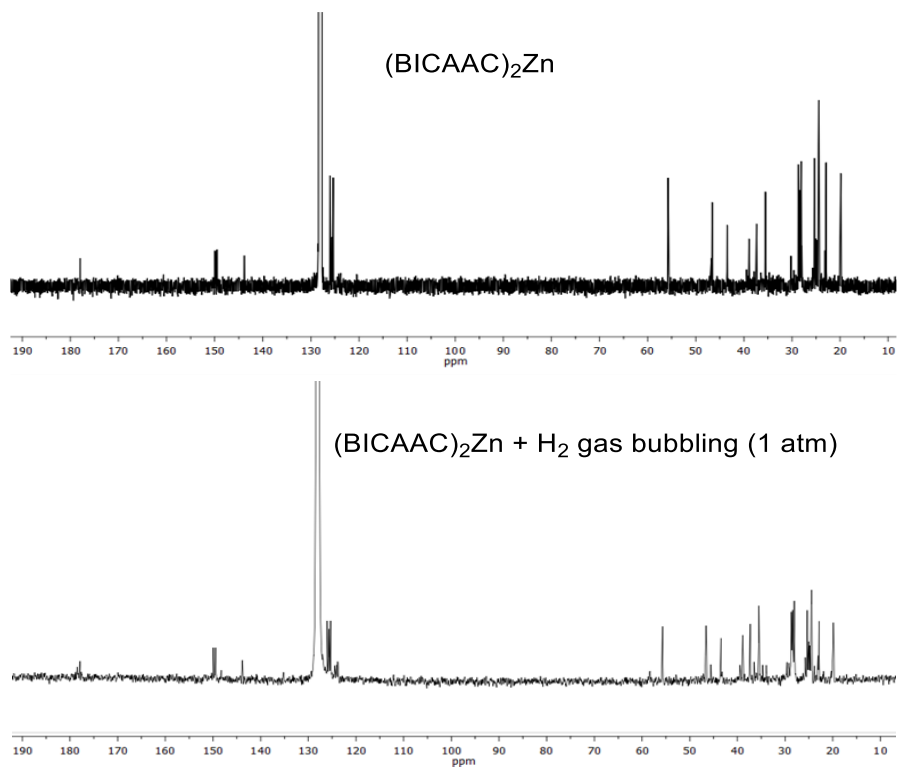

**Fig. S9**  $^{13}\text{C}$  NMR spectrum of compound **2** (without exposure to  $\text{H}_2$  shown in the top part) and bottom spectrum shown after exposure with  $\text{H}_2$  gas (bubbling), recorded in  $\text{C}_6\text{D}_6$ .

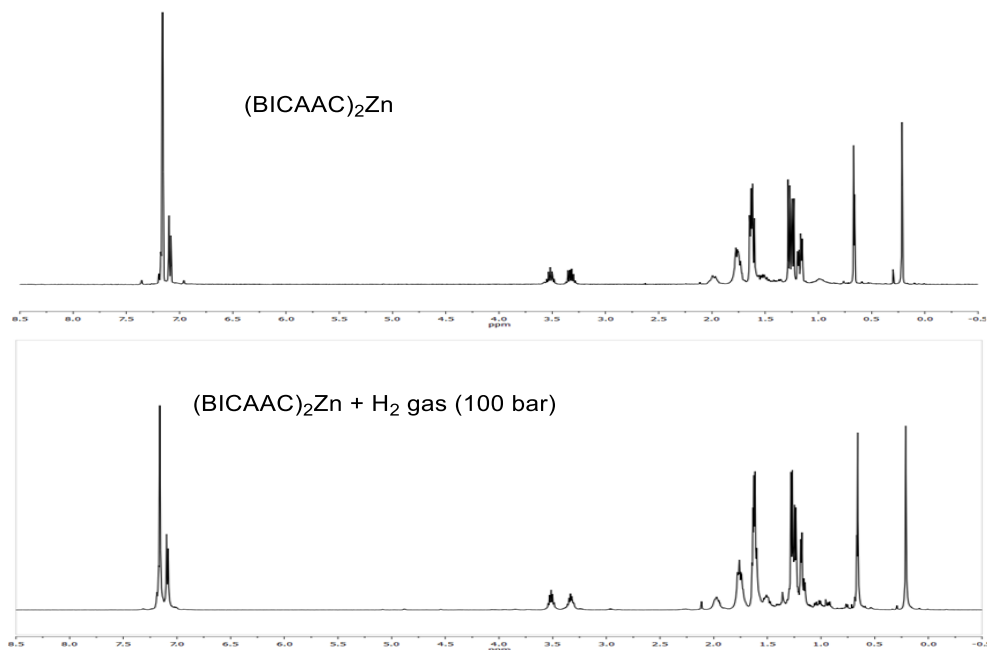

**Fig. S10**  $^1\text{H}$  NMR spectrum of reaction of compound **2** with  $\text{H}_2$  gas (100 bar) in  $\text{C}_6\text{D}_6$ . The top part shows the  $^1\text{H}$  NMR spectrum of **2** without exposure to  $\text{H}_2$  gas.

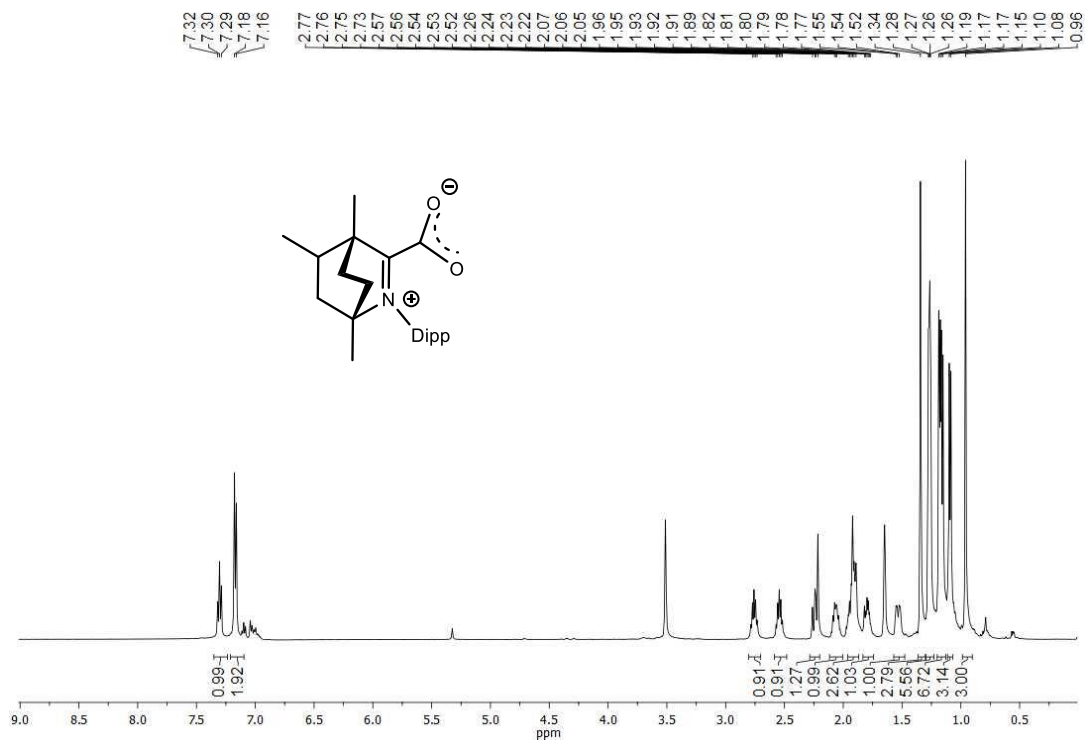

**Fig. S11**  $^1\text{H}$  NMR spectrum of compound **3** in  $\text{CD}_2\text{Cl}_2 + \text{THF-}d_8$

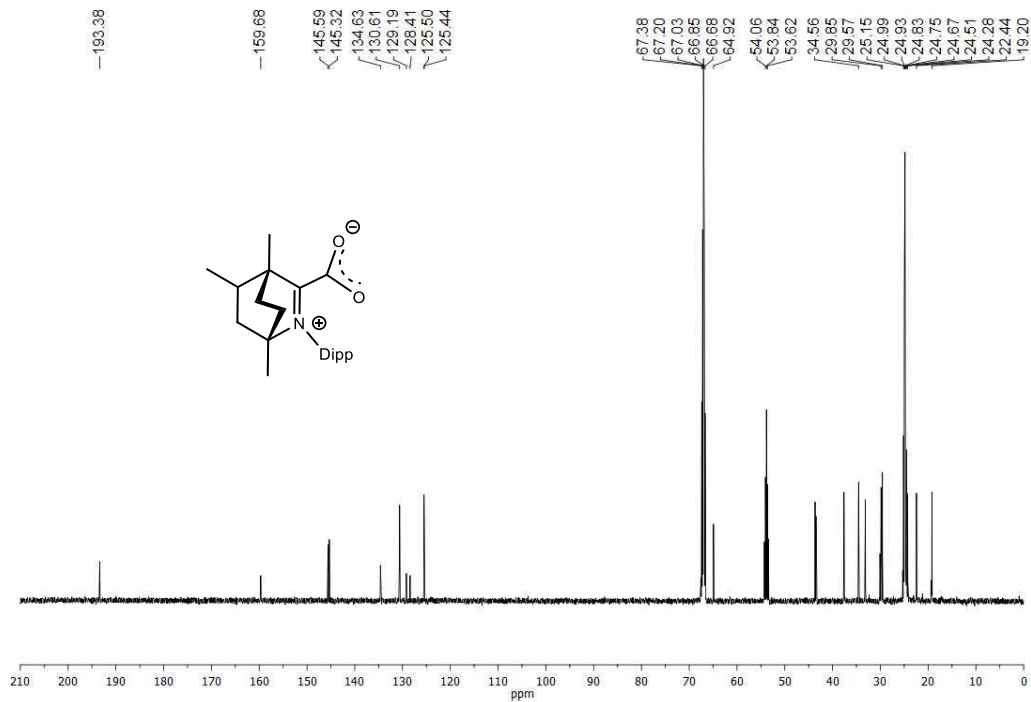

Fig. S12 <sup>13</sup>C NMR spectrum of compound 3 in CD<sub>2</sub>Cl<sub>2</sub> + THF-*d*<sub>8</sub>

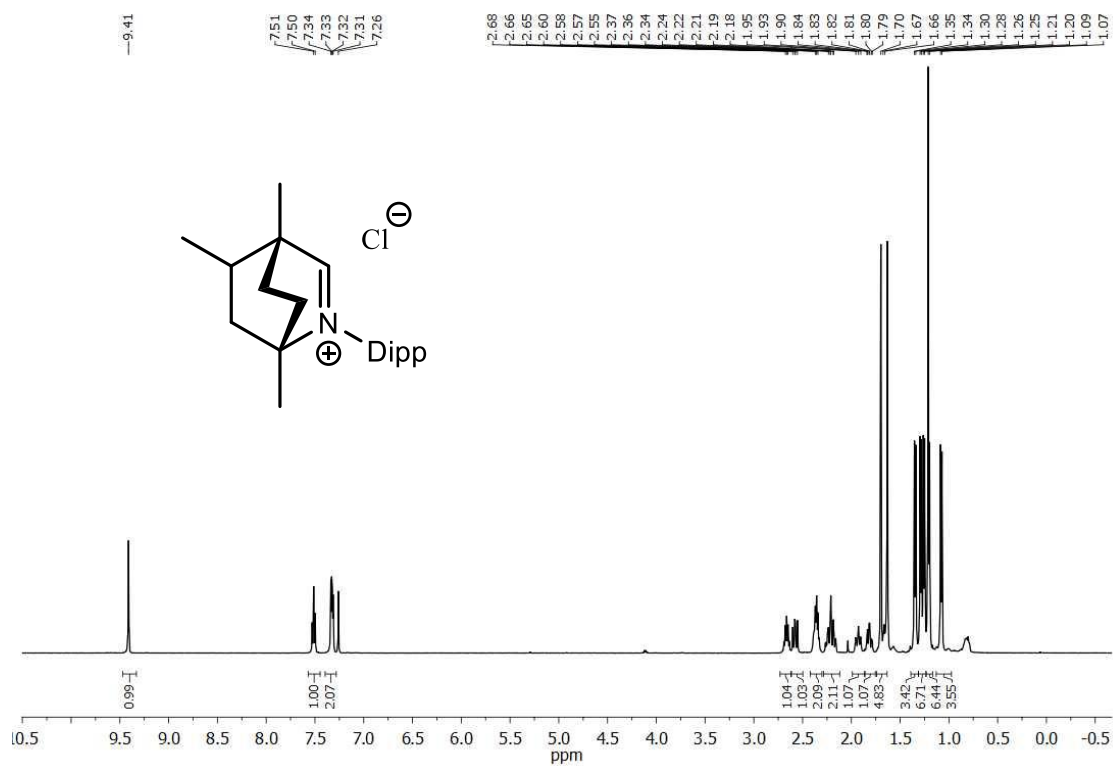

Fig. S13 <sup>1</sup>H NMR spectrum of compound 4 in CDCl<sub>3</sub>

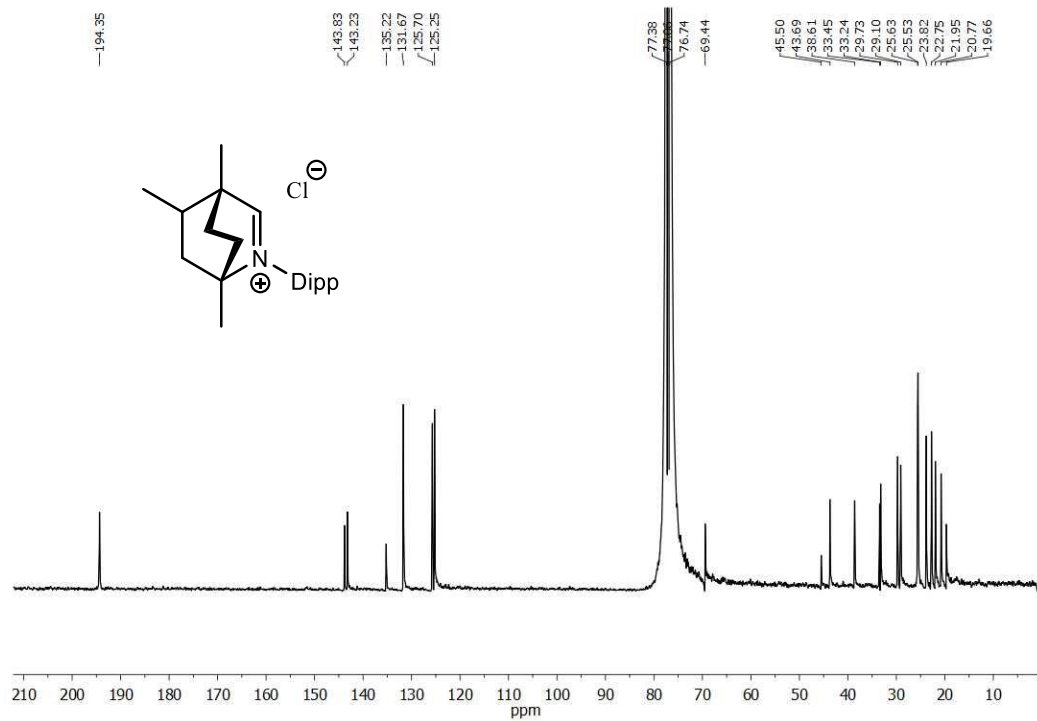

**Fig. S14**  $^{13}\text{C}$  NMR spectrum of compound 4 in  $\text{CDCl}_3$

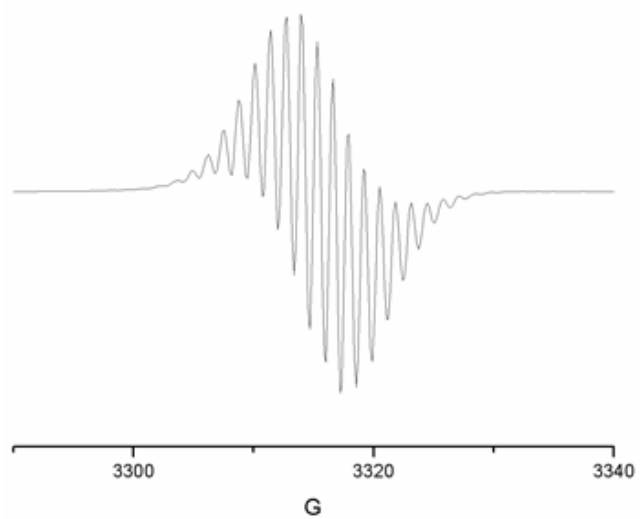

**Fig. S15** EPR spectrum of  $\text{Ph}_3\text{C}\cdot$  at 25 °C

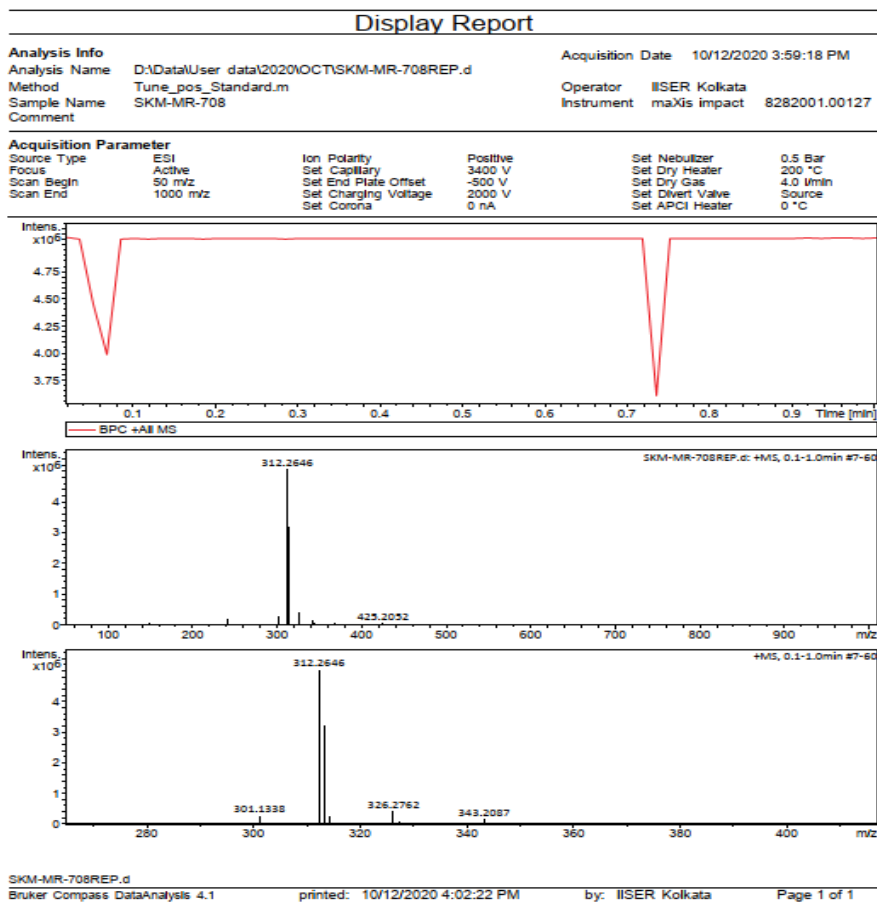

**Fig. S16** HRMS spectrum of compound **4**,  $[M-Cl]^+$  peak

**Table S1.** Crystallographic data for compounds **1** and **2**

| Compound          | <b>1</b>                    | <b>2</b>               |
|-------------------|-----------------------------|------------------------|
| Empirical formula | $C_{54.5}H_{78}Cl_4N_2Zn_2$ | $C_{88}H_{132}N_4Zn_2$ |
| Formula weight    | 1033.72                     | 1376.71                |
| Temperature (K)   | 293(2)                      | 100.0                  |
| Crystal system    | monoclinic                  | triclinic              |
| Space group       | $P2_1/c$                    | P-1                    |
| $a$ (Å)           | 9.6552(7)                   | 9.8500(4)              |
| $b$ (Å)           | 17.3124(13)                 | 12.5419(5)             |
| $c$ (Å)           | 15.8733(13)                 | 16.7728(6)             |
| $\alpha$ (°)      | 90                          | 79.912(3)              |
| $\beta$ (°)       | 99.979(7)                   | 85.521(3)              |

|                                                              |                                                                                 |                                                                                 |
|--------------------------------------------------------------|---------------------------------------------------------------------------------|---------------------------------------------------------------------------------|
| $\gamma$ (°)                                                 | 90                                                                              | 70.669(4)                                                                       |
| V(Å <sup>3</sup> )                                           | 2613.2(4)                                                                       | 1924.58(14)                                                                     |
| Z                                                            | 2                                                                               | 1                                                                               |
| $\rho_{\text{calc}}$ (g/cm <sup>3</sup> )                    | 1.314                                                                           | 1.188                                                                           |
| $\mu$ (mm <sup>-1</sup> )                                    | 1.159                                                                           | 1.105                                                                           |
| <i>F</i> (000)                                               | 1094.0                                                                          | 748.0                                                                           |
| Crystal size/mm <sup>3</sup>                                 | 0.4 × 0.3 × 0.2                                                                 | 0.2 × 0.15 × 0.1                                                                |
| Radiation                                                    | MoK $\alpha$ ( $\lambda$ = 0.71073)                                             | CuK $\alpha$ ( $\lambda$ = 1.54184)                                             |
| Chemical_formula_sum                                         | 'C54.50 H78 Cl4 N2 Zn2'                                                         | 'C88 H132 N4 Zn2'                                                               |
| Cell_measurement_reflns_used                                 | 3654                                                                            | 6719                                                                            |
| Cell_measurement_temperature                                 | 293.0                                                                           | 100.00 K                                                                        |
| Cell_measurement_theta_max                                   | 25.0730                                                                         | 66.1570                                                                         |
| Cell_measurement_theta_min                                   | 2.0940                                                                          | 2.6460                                                                          |
| Shelx_estimated_absorpt_T_max                                | 0.801                                                                           | 0.898                                                                           |
| Shelx_estimated_absorpt_T_min                                | 0.654                                                                           | 0.809                                                                           |
| Exptl_absorpt_coefficient_mu                                 | 1.159                                                                           | 1.105                                                                           |
| Exptl_absorpt_correction_T_max                               | 1.00000                                                                         | 1.00000                                                                         |
| Exptl_absorpt_correction_T_min                               | 0.48418                                                                         | 0.75632                                                                         |
| Exptl_absorpt_correction_type                                | multi-scan                                                                      | multi-scan                                                                      |
| 2 $\Theta$ range for data collection/°                       | 3.51 to 50.046                                                                  | 5.352 to 132.468                                                                |
| Index ranges                                                 | -11 ≤ <i>h</i> ≤ 11, -20 ≤ <i>k</i> ≤ 20,<br>-17 ≤ <i>l</i> ≤ 18                | -11 ≤ <i>h</i> ≤ 11, -14 ≤ <i>k</i> ≤ 14,<br>-19 ≤ <i>l</i> ≤ 19                |
| Reflections collected                                        | 14705                                                                           | 18938                                                                           |
| Independent reflections                                      | 4614 [ <i>R</i> <sub>int</sub> = 0.0745,<br><i>R</i> <sub>sigma</sub> = 0.0636] | 6704 [ <i>R</i> <sub>int</sub> = 0.0420,<br><i>R</i> <sub>sigma</sub> = 0.0473] |
| Data/restraints/parameters                                   | 4614/274/291                                                                    | 6704/634/602                                                                    |
| Goodness-of-fit                                              | 1.034                                                                           | 1.142                                                                           |
| Final <i>R</i> indexes [ <i>I</i> ≥ 2 $\sigma$ ( <i>I</i> )] | <i>R</i> <sub>1</sub> = 0.0497, <i>wR</i> <sub>2</sub> =<br>0.1288              | <i>R</i> <sub>1</sub> = 0.0472, <i>wR</i> <sub>2</sub> =<br>0.1041              |
| Final <i>R</i> indexes [all data]                            | <i>R</i> <sub>1</sub> = 0.0647, <i>wR</i> <sub>2</sub> =<br>0.1447              | <i>R</i> <sub>1</sub> = 0.0572, <i>wR</i> <sub>2</sub> =<br>0.1085              |
| Largest diff. peak/hole / e Å <sup>-3</sup>                  | 0.58/-0.56                                                                      | 0.38/-0.45                                                                      |

---

<sup>a</sup>  $R1 = \sum ||F_o| - |F_c|| / \sum |F_o|$ .  $wR2 = [\sum w(F_o^2 - F_c^2)^2 / \sum w(F_o^2)^2]^{0.5}$ .

## Coordinates and energies of (BICAAC)<sub>2</sub>Zn at different spin-state

### Singlet

|    |             |             |             |
|----|-------------|-------------|-------------|
| Zn | -0.00017900 | -0.00627600 | -0.02016700 |
| N  | 2.82676500  | 0.51278300  | -0.22742900 |
| C  | 3.97347300  | 1.38907800  | -0.55101800 |
| C  | 3.20469900  | -2.46064100 | 1.97888700  |
| H  | 3.26421600  | -2.69876500 | 3.04353800  |
| C  | 3.00489800  | -1.13227500 | 1.58516500  |
| C  | 1.57102700  | 1.02924800  | -0.37656400 |
| C  | 2.96291700  | -0.84018700 | 0.20445700  |
| C  | 3.32493400  | -3.47850500 | 1.03882400  |
| H  | 3.49222500  | -4.50662900 | 1.36427500  |
| C  | 3.83077500  | 1.83091000  | -2.02197300 |
| H  | 4.05216100  | 0.98062300  | -2.68349400 |
| H  | 4.59497000  | 2.59765300  | -2.22252900 |
| C  | 3.20769500  | -3.18642200 | -0.31610800 |
| H  | 3.26938800  | -3.99330000 | -1.05003700 |
| C  | 5.30138000  | 0.69620000  | -0.29891300 |
| H  | 5.40560800  | 0.40985300  | 0.75660500  |
| H  | 6.12209400  | 1.37939300  | -0.55920900 |
| H  | 5.39857800  | -0.21455800 | -0.90522400 |
| C  | 2.83785200  | -0.05855100 | 2.64801000  |
| H  | 2.64809200  | 0.88736200  | 2.12569400  |
| C  | 3.00256100  | -1.87386500 | -0.75698200 |
| C  | 3.82672800  | 2.65551100  | 0.31149300  |
| H  | 4.66489500  | 3.33404900  | 0.08968000  |
| H  | 3.91834800  | 2.37130200  | 1.37173300  |
| C  | 2.81239500  | -1.60966700 | -2.24209700 |
| H  | 2.58897000  | -0.54101300 | -2.36032500 |
| C  | 2.46461100  | 3.34118500  | 0.04578200  |
| H  | 2.63952900  | 4.28363200  | -0.50207700 |
| C  | 1.62658500  | 2.44065800  | -0.91587500 |
| C  | 2.40833200  | 2.37712200  | -2.25358500 |
| H  | 2.43548100  | 3.38448900  | -2.69955900 |
| H  | 1.84566800  | 1.73040600  | -2.94431000 |
| C  | 0.22896300  | 2.99735900  | -1.15041100 |
| H  | -0.26017400 | 2.46789300  | -1.98223100 |
| H  | 0.25852300  | 4.07022600  | -1.39998200 |
| H  | -0.40658500 | 2.87239500  | -0.25791900 |
| C  | 1.75064800  | 3.68195600  | 1.34946600  |
| H  | 1.49676300  | 2.76182300  | 1.89921900  |
| H  | 0.81885200  | 4.23907700  | 1.17696200  |
| H  | 2.39866600  | 4.29734300  | 1.99162900  |
| N  | -2.82661000 | -0.51770000 | 0.22033300  |
| C  | -3.97170000 | -1.39413800 | 0.54922500  |

|   |             |             |             |
|---|-------------|-------------|-------------|
| C | -3.22368600 | 2.49424300  | -1.93120100 |
| H | -3.30335200 | 2.74962300  | -2.99051900 |
| C | -3.03395000 | 1.15711500  | -1.56231700 |
| C | -1.57021400 | -1.03680300 | 0.35533100  |
| C | -2.96231800 | 0.84297300  | -0.18775800 |
| C | -3.30940600 | 3.49872700  | -0.97345700 |
| H | -3.46956600 | 4.53398600  | -1.27929700 |
| C | -3.81435400 | -1.84719800 | 2.01520500  |
| H | -4.02059900 | -0.99953800 | 2.68484900  |
| H | -4.58201800 | -2.60913900 | 2.22048800  |
| C | -3.16787200 | 3.18368500  | 0.37412000  |
| H | -3.20484600 | 3.97950000  | 1.12163900  |
| C | -5.30026400 | -0.69563600 | 0.31719300  |
| H | -5.41414300 | -0.39924000 | -0.73450100 |
| H | -6.12023900 | -1.37906300 | 0.57919000  |
| H | -5.38879100 | 0.20961600  | 0.93319900  |
| C | -2.91008000 | 0.09794900  | -2.64546900 |
| H | -2.74090300 | -0.86197600 | -2.14201600 |
| C | -2.96951300 | 1.86214800  | 0.79015800  |
| C | -3.83826200 | -2.65549000 | -0.32300200 |
| H | -4.67064100 | -3.33651000 | -0.08755400 |
| H | -3.95203000 | -2.36766000 | -1.38000400 |
| C | -2.75573700 | 1.57302600  | 2.26736200  |
| H | -2.53675100 | 0.50151000  | 2.36506800  |
| C | -2.46968000 | -3.34010100 | -0.08746600 |
| H | -2.63333400 | -4.29398500 | 0.44370100  |
| C | -1.62338400 | -2.45376500 | 0.87987300  |
| C | -2.39349000 | -2.40600000 | 2.22499400  |
| H | -2.42311300 | -3.42030100 | 2.65479400  |
| H | -1.82056900 | -1.77470700 | 2.92159400  |
| C | -0.22510500 | -3.01561200 | 1.09774100  |
| H | 0.27278300  | -2.49316500 | 1.92884400  |
| H | -0.25552400 | -4.08999900 | 1.34048500  |
| H | 0.40348100  | -2.88649400 | 0.20105700  |
| C | -1.76862800 | -3.64991400 | -1.40599400 |
| H | -1.52067800 | -2.71620300 | -1.93566900 |
| H | -0.83458600 | -4.20961400 | -1.25529100 |
| H | -2.42192800 | -4.25135700 | -2.05593800 |
| C | 1.59847800  | -2.37667500 | -2.77738200 |
| H | 1.74018100  | -3.46645500 | -2.70214900 |
| H | 0.69911700  | -2.09813800 | -2.20810900 |
| H | 1.42549700  | -2.13109800 | -3.83633400 |
| C | 4.06917700  | -1.94346800 | -3.05188100 |
| H | 3.91594600  | -1.70555000 | -4.11522100 |
| H | 4.94506500  | -1.37969800 | -2.69955700 |
| H | 4.31141500  | -3.01502700 | -2.98000000 |



|   |             |             |             |
|---|-------------|-------------|-------------|
| C | 1.61385600  | -0.33601000 | 3.52850200  |
| H | 1.71756800  | -1.28400100 | 4.08012900  |
| H | 1.48315500  | 0.47098200  | 4.26578800  |
| H | 0.70522000  | -0.38357100 | 2.90848200  |
| C | 4.09834400  | 0.10171600  | 3.50383000  |
| H | 3.96731300  | 0.91700300  | 4.23104700  |
| H | 4.31400100  | -0.81876300 | 4.06798000  |
| H | 4.98146900  | 0.33128700  | 2.89033700  |
| C | -1.69098700 | 0.35701700  | -3.53834200 |
| H | -1.77505700 | 1.31934900  | -4.06816100 |
| H | -0.77232000 | 0.36499400  | -2.93194400 |
| H | -1.59547900 | -0.43741300 | -4.29440600 |
| C | -4.18515300 | -0.01236700 | -3.48767300 |
| H | -4.08774400 | -0.82150900 | -4.22687600 |
| H | -5.06813600 | -0.22219600 | -2.86704800 |
| H | -4.37858900 | 0.92137300  | -4.03782600 |
| C | -3.99805400 | 1.90043600  | 3.10168500  |
| H | -3.83045200 | 1.64377800  | 4.15850400  |
| H | -4.23508500 | 2.97436800  | 3.05109900  |
| H | -4.88229300 | 1.34754200  | 2.75277000  |
| C | -1.52861200 | 2.32388200  | 2.79467700  |
| H | -1.66530300 | 3.41562200  | 2.74278800  |
| H | -1.33710900 | 2.05709900  | 3.84529300  |
| H | -0.64229300 | 2.05105800  | 2.20246000  |

**Total energy = -3602.85074393**

### Singlet-biradical

|    |            |             |             |
|----|------------|-------------|-------------|
| Zn | 0.00001600 | -0.00007700 | -0.00015500 |
| N  | 2.84914300 | 0.48240600  | -0.21562300 |
| C  | 4.01087500 | 1.33805800  | -0.53593500 |
| C  | 3.16385800 | -2.55538000 | 1.91394600  |
| H  | 3.22390600 | -2.82075000 | 2.97221200  |
| C  | 3.01149000 | -1.21252600 | 1.55231700  |
| C  | 1.59354200 | 1.04779200  | -0.34599700 |
| C  | 2.95537700 | -0.88224600 | 0.18022100  |
| C  | 3.23210000 | -3.55550800 | 0.94988600  |
| H  | 3.36119000 | -4.59690700 | 1.24928600  |
| C  | 3.87142900 | 1.80774000  | -1.99845800 |
| H  | 4.06608700 | 0.96373900  | -2.67665000 |
| H  | 4.65520400 | 2.55639700  | -2.19242900 |
| C  | 3.10699800 | -3.22634200 | -0.39596200 |
| H  | 3.12316300 | -4.01783300 | -1.14903200 |
| C  | 5.32377600 | 0.60948100  | -0.30439200 |
| H  | 5.42713800 | 0.30357100  | 0.74628400  |
| H  | 6.16073800 | 1.27489800  | -0.55909700 |
| H  | 5.39341600 | -0.29383200 | -0.92644900 |

|   |             |             |             |
|---|-------------|-------------|-------------|
| C | 2.88070600  | -0.15687000 | 2.63714000  |
| H | 2.77311000  | 0.81116900  | 2.13283900  |
| C | 2.94685100  | -1.89733300 | -0.80209500 |
| C | 3.90496300  | 2.59726400  | 0.34327500  |
| H | 4.76053400  | 3.25492400  | 0.12441100  |
| H | 3.99677600  | 2.29964000  | 1.39987500  |
| C | 2.72763800  | -1.58874400 | -2.27374000 |
| H | 2.58000300  | -0.50469100 | -2.36194900 |
| C | 2.56103800  | 3.32760500  | 0.09665100  |
| H | 2.76194200  | 4.27459400  | -0.43488600 |
| C | 1.69279100  | 2.46357600  | -0.87002500 |
| C | 2.46294400  | 2.39907100  | -2.21353900 |
| H | 2.51950700  | 3.40953800  | -2.65036100 |
| H | 1.87777300  | 1.77716900  | -2.90896900 |
| C | 0.31115400  | 3.06492200  | -1.08912700 |
| H | -0.20929200 | 2.54165500  | -1.90653200 |
| H | 0.37181500  | 4.13282800  | -1.35461400 |
| H | -0.31594300 | 2.97402400  | -0.18704700 |
| C | 1.86838700  | 3.66817100  | 1.41214800  |
| H | 1.58911700  | 2.74706300  | 1.94772000  |
| H | 0.95535200  | 4.26084000  | 1.25766500  |
| H | 2.54103300  | 4.24958100  | 2.06076600  |
| N | -2.84912200 | -0.48235500 | 0.21569100  |
| C | -4.01087000 | -1.33797800 | 0.53603000  |
| C | -3.16367400 | 2.55555300  | -1.91373700 |
| H | -3.22368400 | 2.82099200  | -2.97198900 |
| C | -3.01134700 | 1.21266900  | -1.55219400 |
| C | -1.59355300 | -1.04788700 | 0.34568500  |
| C | -2.95532200 | 0.88230700  | -0.18011600 |
| C | -3.23196600 | 3.55562100  | -0.94961800 |
| H | -3.36102900 | 4.59703900  | -1.24896500 |
| C | -3.87129200 | -1.80791100 | 1.99846200  |
| H | -4.06608400 | -0.96410200 | 2.67685600  |
| H | -4.65493300 | -2.55675000 | 2.19228500  |
| C | -3.10695900 | 3.22637000  | 0.39621900  |
| H | -3.12314800 | 4.01781200  | 1.14934000  |
| C | -5.32375600 | -0.60928800 | 0.30476200  |
| H | -5.42727000 | -0.30326700 | -0.74586600 |
| H | -6.16072100 | -1.27467000 | 0.55954700  |
| H | -5.39322800 | 0.29397100  | 0.92691700  |
| C | -2.88065000 | 0.15707700  | -2.63709300 |
| H | -2.77290300 | -0.81098900 | -2.13287400 |
| C | -2.94685000 | 1.89733200  | 0.80226600  |
| C | -3.90509800 | -2.59704300 | -0.34339800 |
| H | -4.76079400 | -3.25462200 | -0.12478100 |
| H | -3.99672000 | -2.29916600 | -1.39994300 |

|   |             |             |             |
|---|-------------|-------------|-------------|
| C | -2.72763100 | 1.58862400  | 2.27388300  |
| H | -2.58008900 | 0.50455100  | 2.36200300  |
| C | -2.56131800 | -3.32764200 | -0.09677100 |
| H | -2.76239300 | -4.27451100 | 0.43492100  |
| C | -1.69281200 | -2.46367000 | 0.86972600  |
| C | -2.46271200 | -2.39906000 | 2.21337800  |
| H | -2.51909200 | -3.40945700 | 2.65038200  |
| H | -1.87746800 | -1.77697400 | 2.90858500  |
| C | -0.31117900 | -3.06510800 | 1.08857500  |
| H | 0.20946300  | -2.54186600 | 1.90587400  |
| H | -0.37185600 | -4.13300800 | 1.35408600  |
| H | 0.31573600  | -2.97426300 | 0.18636500  |
| C | -1.86886200 | -3.66855000 | -1.41228100 |
| H | -1.58938100 | -2.74757600 | -1.94797500 |
| H | -0.95598100 | -4.26145900 | -1.25781000 |
| H | -2.54172300 | -4.24983600 | -2.06078700 |
| C | 1.44258500  | -2.25695700 | -2.77456600 |
| H | 1.51216000  | -3.35528100 | -2.72578000 |
| H | 0.58133800  | -1.94311200 | -2.16457300 |
| H | 1.24253900  | -1.97663900 | -3.81996700 |
| C | 3.92883700  | -1.99013900 | -3.13398000 |
| H | 3.75870600  | -1.71484100 | -4.18563300 |
| H | 4.85180700  | -1.49607300 | -2.79683800 |
| H | 4.09855200  | -3.07726000 | -3.09581300 |
| C | 1.60977700  | -0.37879600 | 3.46545600  |
| H | 1.64096200  | -1.34288300 | 3.99803400  |
| H | 1.49533600  | 0.41878200  | 4.21547000  |
| H | 0.71575100  | -0.37210100 | 2.82202300  |
| C | 4.11687700  | -0.09806500 | 3.53869700  |
| H | 4.01542600  | 0.71116100  | 4.27722700  |
| H | 4.25219900  | -1.04013000 | 4.09202000  |
| H | 5.03290000  | 0.08279700  | 2.95780900  |
| C | -1.60987200 | 0.37910800  | -3.46560800 |
| H | -1.64112200 | 1.34326200  | -3.99805900 |
| H | -0.71573300 | 0.37229400  | -2.82233100 |
| H | -1.49559200 | -0.41837000 | -4.21575100 |
| C | -4.11698100 | 0.09826600  | -3.53843300 |
| H | -4.01558400 | -0.71084100 | -4.27710100 |
| H | -5.03287100 | -0.08278600 | -2.95739500 |
| H | -4.25250900 | 1.04040700  | -4.09157800 |
| C | -3.92874000 | 1.99004900  | 3.13422800  |
| H | -3.75855700 | 1.71465300  | 4.18584700  |
| H | -4.09837100 | 3.07718700  | 3.09617300  |
| H | -4.85177700 | 1.49608600  | 2.79711500  |
| C | -1.44250000 | 2.25671300  | 2.77468300  |
| H | -1.51206400 | 3.35504600  | 2.72606400  |

|   |             |            |            |
|---|-------------|------------|------------|
| H | -1.24233700 | 1.97622900 | 3.82001900 |
| H | -0.58132900 | 1.94295200 | 2.16454300 |

**Total energy= -3602.86944879**

**Triplet**

|    |             |             |             |
|----|-------------|-------------|-------------|
| Zn | -0.00000200 | -0.00001400 | -0.00001000 |
| N  | 2.85473700  | 0.45313800  | -0.21782100 |
| C  | 4.03080200  | 1.28285400  | -0.55047600 |
| C  | 3.12273300  | -2.59469100 | 1.90344500  |
| H  | 3.18389100  | -2.86375700 | 2.96072800  |
| C  | 2.99263500  | -1.24869000 | 1.54531000  |
| C  | 1.60910900  | 1.05654200  | -0.32368100 |
| C  | 2.93419900  | -0.91353800 | 0.17438100  |
| C  | 3.16640800  | -3.59384100 | 0.93675800  |
| H  | 3.27861400  | -4.63806200 | 1.23308400  |
| C  | 3.88692700  | 1.75751300  | -2.01112200 |
| H  | 4.06049100  | 0.91168100  | -2.69291400 |
| H  | 4.68254100  | 2.49221600  | -2.21076300 |
| C  | 3.03538800  | -3.25969100 | -0.40728600 |
| H  | 3.02830600  | -4.05004200 | -1.16175400 |
| C  | 5.33003700  | 0.52598600  | -0.33243100 |
| H  | 5.43780700  | 0.21870400  | 0.71758600  |
| H  | 6.17888000  | 1.17231700  | -0.59679700 |
| H  | 5.37309400  | -0.37920300 | -0.95433800 |
| C  | 2.87810800  | -0.19241900 | 2.63107800  |
| H  | 2.79743000  | 0.77888800  | 2.12800500  |
| C  | 2.89663100  | -1.92703100 | -0.80910900 |
| C  | 3.96213400  | 2.54391500  | 0.33058000  |
| H  | 4.83518500  | 3.17809500  | 0.11118600  |
| H  | 4.04790000  | 2.24152300  | 1.38643400  |
| C  | 2.66241300  | -1.60984600 | -2.27652700 |
| H  | 2.54610500  | -0.52161400 | -2.36037400 |
| C  | 2.63879300  | 3.31282100  | 0.08944900  |
| H  | 2.86378100  | 4.24888000  | -0.45205900 |
| C  | 1.73661200  | 2.46455200  | -0.86023600 |
| C  | 2.48773400  | 2.37562100  | -2.21325500 |
| H  | 2.56000400  | 3.38090500  | -2.65997500 |
| H  | 1.88116700  | 1.76003400  | -2.89615100 |
| C  | 0.36725900  | 3.09782800  | -1.06455200 |
| H  | -0.17971500 | 2.57720500  | -1.86662600 |
| H  | 0.44957900  | 4.16049200  | -1.34502700 |
| H  | -0.24640800 | 3.03321000  | -0.15139000 |
| C  | 1.96995800  | 3.68545500  | 1.40854300  |
| H  | 1.66216400  | 2.77720800  | 1.95063900  |
| H  | 1.07803200  | 4.31052600  | 1.25828600  |

|   |             |             |             |
|---|-------------|-------------|-------------|
| H | 2.66841000  | 4.24518000  | 2.04895300  |
| N | -2.85474300 | -0.45317000 | 0.21779700  |
| C | -4.03080800 | -1.28293500 | 0.55032400  |
| C | -3.12291100 | 2.59504600  | -1.90291300 |
| H | -3.18422000 | 2.86429900  | -2.96014000 |
| C | -2.99282000 | 1.24897400  | -1.54503700 |
| C | -1.60911600 | -1.05660100 | 0.32353500  |
| C | -2.93419200 | 0.91357600  | -0.17417300 |
| C | -3.16638400 | 3.59402800  | -0.93604600 |
| H | -3.27857400 | 4.63830800  | -1.23217200 |
| C | -3.88690900 | -1.75785800 | 2.01088200  |
| H | -4.06042400 | -0.91213900 | 2.69282500  |
| H | -4.68254200 | -2.49256800 | 2.21041900  |
| C | -3.03516400 | 3.25963600  | 0.40791800  |
| H | -3.02790800 | 4.04985400  | 1.16252400  |
| C | -5.33003800 | -0.52601300 | 0.33243800  |
| H | -5.43782400 | -0.21854200 | -0.71752200 |
| H | -6.17888500 | -1.17237900 | 0.59670500  |
| H | -5.37306900 | 0.37906500  | 0.95450800  |
| C | -2.87855200 | 0.19289400  | -2.63101700 |
| H | -2.79780900 | -0.77850600 | -2.12813800 |
| C | -2.89641900 | 1.92689800  | 0.80948700  |
| C | -3.96218400 | -2.54384900 | -0.33094700 |
| H | -4.83521600 | -3.17806900 | -0.11158800 |
| H | -4.04803400 | -2.24129800 | -1.38674800 |
| C | -2.66192300 | 1.60945300  | 2.27680300  |
| H | -2.54562600 | 0.52120300  | 2.36043700  |
| C | -2.63882000 | -3.31278700 | -0.09003000 |
| H | -2.86377700 | -4.24897500 | 0.45126700  |
| C | -1.73662600 | -2.46471600 | 0.85981500  |
| C | -2.48773000 | -2.37604700 | 2.21286300  |
| H | -2.56001900 | -3.38142600 | 2.65936600  |
| H | -1.88113700 | -1.76062300 | 2.89588200  |
| C | -0.36728200 | -3.09805500 | 1.06399800  |
| H | 0.17973500  | -2.57755700 | 1.86612500  |
| H | -0.44962200 | -4.16075500 | 1.34433100  |
| H | 0.24636100  | -3.03333500 | 0.15082700  |
| C | -1.97001000 | -3.68511300 | -1.40922600 |
| H | -1.66220200 | -2.77674400 | -1.95111100 |
| H | -1.07809200 | -4.31023700 | -1.25913000 |
| H | -2.66847700 | -4.24467700 | -2.04976100 |
| C | 1.34993900  | -2.23992200 | -2.75607500 |
| H | 1.38779100  | -3.33974600 | -2.70527600 |
| H | 0.50356600  | -1.90451000 | -2.13623700 |
| H | 1.14245600  | -1.95621900 | -3.79909600 |
| C | 3.83608900  | -2.04438900 | -3.15808800 |

|   |             |             |             |
|---|-------------|-------------|-------------|
| H | 3.65720900  | -1.75977400 | -4.20578200 |
| H | 4.77866900  | -1.57942100 | -2.83408300 |
| H | 3.97359100  | -3.13627000 | -3.12675500 |
| C | 1.59339600  | -0.38848200 | 3.44463000  |
| H | 1.59902000  | -1.35364600 | 3.97614400  |
| H | 1.48604600  | 0.41061200  | 4.19405700  |
| H | 0.70420900  | -0.36607800 | 2.79448600  |
| C | 4.10587600  | -0.16358400 | 3.54493100  |
| H | 4.01604400  | 0.64699300  | 4.28345800  |
| H | 4.21489700  | -1.10889100 | 4.09851500  |
| H | 5.03075300  | -0.00272000 | 2.97215400  |
| C | -1.59400800 | 0.38905000  | -3.44481100 |
| H | -1.59970900 | 1.35431100  | -3.97614900 |
| H | -0.70467700 | 0.36649200  | -2.79487000 |
| H | -1.48685600 | -0.40991100 | -4.19440800 |
| C | -4.10651300 | 0.16427000  | -3.54461700 |
| H | -4.01688600 | -0.64620200 | -4.28328500 |
| H | -5.03127900 | 0.00337900  | -2.97166900 |
| H | -4.21559200 | 1.10966700  | -4.09803900 |
| C | -3.83541100 | 2.04388100  | 3.15867200  |
| H | -3.65632700 | 1.75909000  | 4.20628300  |
| H | -3.97289200 | 3.13577100  | 3.12754600  |
| H | -4.77806900 | 1.57899100  | 2.83478200  |
| C | -1.34933400 | 2.23940800  | 2.75619000  |
| H | -1.38717200 | 3.33924300  | 2.70561300  |
| H | -1.14163300 | 1.95549600  | 3.79911100  |
| H | -0.50310900 | 1.90409400  | 2.13609800  |

**Total energy= -3602.86411255**

### **Coordinates and energies of (CAAC)<sub>2</sub>Zn at different spin-state**

#### **Singlet-biradicaloid**

|    |             |             |             |
|----|-------------|-------------|-------------|
| Zn | 0.00005000  | 0.00013900  | -0.00024300 |
| N  | -2.75306400 | -0.82693000 | -0.17645100 |
| C  | -1.44227800 | -1.26580800 | -0.23974200 |
| C  | -1.45742200 | -2.76620600 | -0.46543200 |
| C  | -1.14254600 | -3.52318300 | 0.83764700  |
| C  | -0.42725000 | -3.18521500 | -1.51768500 |
| C  | -2.90597900 | -3.01814500 | -0.95141700 |
| C  | -3.77894000 | -1.87241200 | -0.39680000 |
| C  | -4.49316300 | -2.25985900 | 0.90451600  |
| C  | -4.84214800 | -1.42801400 | -1.40179900 |
| C  | -3.01714600 | 0.55399600  | 0.05372600  |
| C  | -3.13453100 | 1.04325000  | 1.37663800  |
| C  | -3.39324100 | 2.40464700  | 1.57116400  |
| C  | -3.48766300 | 3.28074400  | 0.49607600  |

|   |             |             |             |
|---|-------------|-------------|-------------|
| C | -3.29358400 | 2.80617900  | -0.79659100 |
| C | -3.04647200 | 1.45099500  | -1.04243900 |
| C | -2.78265300 | 1.00613800  | -2.47333200 |
| C | -1.50337200 | 1.64991100  | -3.02101800 |
| C | -3.96492600 | 1.32179200  | -3.39628400 |
| C | -2.91091900 | 0.16197400  | 2.59523400  |
| C | -4.11066300 | 0.16502100  | 3.54724100  |
| C | -1.64344400 | 0.59618900  | 3.34213700  |
| H | -0.09646800 | -3.34132400 | 1.12782800  |
| H | -1.77917500 | -3.18895100 | 1.66921000  |
| H | -1.27838600 | -4.60950100 | 0.70603700  |
| H | -0.63238500 | -2.69762700 | -2.48232900 |
| H | 0.58711900  | -2.89157200 | -1.19681900 |
| H | -0.42965300 | -4.27733400 | -1.66666200 |
| H | -2.92234200 | -2.97235100 | -2.05177200 |
| H | -5.01958400 | -1.38971500 | 1.32286600  |
| H | -5.23887600 | -3.04262300 | 0.70153800  |
| H | -3.79513300 | -2.64221200 | 1.66002400  |
| H | -5.36010600 | -0.52196400 | -1.05007600 |
| H | -4.40392300 | -1.22320200 | -2.38662900 |
| H | -5.59239900 | -2.22314300 | -1.52229500 |
| H | -3.49936000 | 2.78739400  | 2.58872800  |
| H | -3.68742500 | 4.33975100  | 0.66725900  |
| H | -3.32942200 | 3.50317700  | -1.63697100 |
| H | -2.61761600 | -0.07990700 | -2.45693400 |
| H | -3.29144200 | -4.00527600 | -0.65403300 |
| H | -1.60496700 | 2.74503400  | -3.08438100 |
| H | -0.63716400 | 1.42701400  | -2.38007400 |
| H | -1.28693300 | 1.27196900  | -4.03176800 |
| H | -4.09182800 | 2.40894100  | -3.51319400 |
| H | -3.79285800 | 0.90011200  | -4.39799700 |
| H | -4.90822900 | 0.91568300  | -3.00695300 |
| H | -2.74292100 | -0.86074500 | 2.23581300  |
| H | -5.04450900 | -0.10361700 | 3.03461200  |
| H | -3.95036200 | -0.55022600 | 4.36768900  |
| H | -4.25305600 | 1.15867800  | 3.99901700  |
| H | -1.75003600 | 1.61636300  | 3.74403300  |
| H | -1.44211600 | -0.08284400 | 4.18466100  |
| H | -0.76632600 | 0.58698000  | 2.67750800  |
| N | 2.75315400  | 0.82689600  | 0.17677200  |
| C | 1.44241800  | 1.26605000  | 0.23922300  |
| C | 1.45776600  | 2.76654200  | 0.46416400  |
| C | 1.14427200  | 3.52288000  | -0.83963200 |
| C | 0.42677500  | 3.18637700  | 1.51526600  |
| C | 2.90600000  | 3.01831800  | 0.95118000  |
| C | 3.77912500  | 1.87218300  | 0.39763000  |

|   |             |             |             |
|---|-------------|-------------|-------------|
| C | 4.49462300  | 2.25895900  | -0.90318300 |
| C | 4.84135900  | 1.42783400  | 1.40368800  |
| C | 3.01703800  | -0.55407200 | -0.05338500 |
| C | 3.13486200  | -1.04321400 | -1.37631000 |
| C | 3.39323500  | -2.40466000 | -1.57088700 |
| C | 3.48689000  | -3.28092100 | -0.49585700 |
| C | 3.29239400  | -2.80644600 | 0.79677400  |
| C | 3.04559800  | -1.45120500 | 1.04268500  |
| C | 2.78136500  | -1.00646900 | 2.47354300  |
| C | 1.50194500  | -1.65025200 | 3.02089500  |
| C | 3.96337600  | -1.32226400 | 3.39678900  |
| C | 2.91200800  | -0.16171500 | -2.59488300 |
| C | 4.11202700  | -0.16511900 | -3.54653300 |
| C | 1.64454900  | -0.59528800 | -3.34218500 |
| H | 0.09836500  | 3.34129800  | -1.13058000 |
| H | 1.78144600  | 3.18787600  | -1.67046400 |
| H | 1.28047500  | 4.60921900  | -0.70857200 |
| H | 0.63109300  | 2.69948400  | 2.48043200  |
| H | -0.58734600 | 2.89252600  | 1.19379100  |
| H | 0.42908700  | 4.27860000  | 1.66345800  |
| H | 2.92150100  | 2.97288600  | 2.05156200  |
| H | 5.02095000  | 1.38842800  | -1.32085600 |
| H | 5.24057400  | 3.04138000  | -0.69975900 |
| H | 3.79746600  | 2.64150200  | -1.65939900 |
| H | 5.35949300  | 0.52163200  | 1.05261500  |
| H | 4.40222500  | 1.22330900  | 2.38817300  |
| H | 5.59162800  | 2.22287300  | 1.52467300  |
| H | 3.49968700  | -2.78731700 | -2.58845000 |
| H | 3.68638900  | -4.33997100 | -0.66707800 |
| H | 3.32764300  | -3.50355300 | 1.63709000  |
| H | 2.61634700  | 0.07958200  | 2.45717700  |
| H | 3.29193200  | 4.00525400  | 0.65375500  |
| H | 1.60347300  | -2.74538300 | 3.08418800  |
| H | 0.63585100  | -1.42726500 | 2.37982400  |
| H | 1.28536700  | -1.27239300 | 4.03164600  |
| H | 4.09015700  | -2.40943500 | 3.51362500  |
| H | 3.79106200  | -0.90066400 | 4.39849300  |
| H | 4.90681900  | -0.91619400 | 3.00776700  |
| H | 2.74432800  | 0.86102600  | -2.23539900 |
| H | 5.04579200  | 0.10327800  | -3.03363000 |
| H | 3.95215900  | 0.55017300  | -4.36702600 |
| H | 4.25427600  | -1.15881200 | -3.99827200 |
| H | 1.75084000  | -1.61541500 | -3.74428500 |
| H | 1.44364800  | 0.08401600  | -4.18459300 |
| H | 0.76729900  | -0.58590900 | -2.67774000 |



**Triplet**

|    |             |             |             |
|----|-------------|-------------|-------------|
| Zn | 0.00125300  | 0.00480300  | -0.01100800 |
| N  | -2.75769400 | -0.82015800 | -0.15204800 |
| C  | -1.44850500 | -1.27271500 | -0.24286800 |
| C  | -1.47913300 | -2.77422200 | -0.44978300 |
| C  | -1.14157700 | -3.52354400 | 0.85249100  |
| C  | -0.47719500 | -3.21406500 | -1.52116600 |
| C  | -2.94034700 | -3.01875100 | -0.90164900 |
| C  | -3.79358300 | -1.86029000 | -0.34138200 |
| C  | -4.48355600 | -2.22993900 | 0.97822500  |
| C  | -4.87394000 | -1.41938500 | -1.32996600 |
| C  | -3.00965300 | 0.56535600  | 0.05834100  |
| C  | -3.10744200 | 1.07795700  | 1.37382300  |
| C  | -3.35992000 | 2.44315000  | 1.54903200  |
| C  | -3.46680600 | 3.30102400  | 0.46048500  |
| C  | -3.28944400 | 2.80425500  | -0.82641300 |
| C  | -3.04966100 | 1.44438900  | -1.05178800 |
| C  | -2.79535700 | 0.97288600  | -2.47546400 |
| C  | -1.50655300 | 1.59027000  | -3.03107400 |
| C  | -3.97298800 | 1.28937500  | -3.40345800 |
| C  | -2.86085200 | 0.21670400  | 2.60200300  |
| C  | -4.03812000 | 0.24004500  | 3.58111200  |
| C  | -1.57568800 | 0.66095500  | 3.31200700  |
| H  | -0.08890700 | -3.34339300 | 1.12007400  |
| H  | -1.76006000 | -3.17924200 | 1.69372600  |
| H  | -1.28384200 | -4.61065600 | 0.73367100  |
| H  | -0.69860300 | -2.73138400 | -2.48481300 |
| H  | 0.54704100  | -2.92893900 | -1.22491400 |
| H  | -0.49431400 | -4.30725300 | -1.66135900 |
| H  | -2.97954400 | -2.98453700 | -2.00187700 |
| H  | -4.99734600 | -1.35260300 | 1.39747200  |
| H  | -5.23676200 | -3.01161900 | 0.79995200  |
| H  | -3.77127400 | -2.60664000 | 1.72334500  |
| H  | -5.38056600 | -0.50727800 | -0.97723100 |
| H  | -4.45296400 | -1.22580000 | -2.32465000 |
| H  | -5.63049700 | -2.21149100 | -1.42943000 |
| H  | -3.45022200 | 2.84379300  | 2.56123300  |
| H  | -3.66145200 | 4.36335900  | 0.61618500  |
| H  | -3.33235800 | 3.48740100  | -1.67778000 |
| H  | -2.64572800 | -0.11487700 | -2.44150600 |
| H  | -3.32741300 | -3.99961100 | -0.58582900 |
| H  | -1.59447100 | 2.68527200  | -3.11358300 |
| H  | -0.64220700 | 1.37202200  | -2.38555900 |
| H  | -1.29129600 | 1.19200000  | -4.03419400 |
| H  | -4.08786100 | 2.37593300  | -3.53699900 |
| H  | -3.80607000 | 0.85046600  | -4.39858700 |

|   |             |             |             |
|---|-------------|-------------|-------------|
| H | -4.92053500 | 0.89948000  | -3.00754200 |
| H | -2.70498100 | -0.81276800 | 2.25608200  |
| H | -4.98338900 | -0.03736500 | 3.09479300  |
| H | -3.85993000 | -0.45959500 | 4.41125000  |
| H | -4.16933600 | 1.24240200  | 4.01678700  |
| H | -1.67272400 | 1.68767500  | 3.69926300  |
| H | -1.35564800 | -0.00412900 | 4.16085900  |
| H | -0.71046500 | 0.64394800  | 2.63141700  |
| N | 2.76026600  | 0.81879900  | 0.16471400  |
| C | 1.45239700  | 1.28041300  | 0.22311900  |
| C | 1.48939400  | 2.78488100  | 0.40348600  |
| C | 1.19613200  | 3.51200100  | -0.92196600 |
| C | 0.46087800  | 3.25183500  | 1.43731200  |
| C | 2.93979300  | 3.02557900  | 0.89083100  |
| C | 3.79900200  | 1.85323700  | 0.36954900  |
| C | 4.53058100  | 2.19912100  | -0.93406200 |
| C | 4.84708200  | 1.41685900  | 1.39429300  |
| C | 3.00662900  | -0.56791600 | -0.04478000 |
| C | 3.11724300  | -1.07752400 | -1.36078800 |
| C | 3.36070600  | -2.44402700 | -1.53702800 |
| C | 3.44684900  | -3.30604600 | -0.44970000 |
| C | 3.25748200  | -2.81162900 | 0.83622800  |
| C | 3.02510800  | -1.45049400 | 1.06292800  |
| C | 2.75478200  | -0.98239900 | 2.48486300  |
| C | 1.46138400  | -1.60281100 | 3.02639900  |
| C | 3.92278000  | -1.30003200 | 3.42465200  |
| C | 2.89311200  | -0.21040500 | -2.58922400 |
| C | 4.08015300  | -0.24317600 | -3.55604300 |
| C | 1.61017600  | -0.63746800 | -3.31354400 |
| H | 0.14977200  | 3.33733700  | -1.21595800 |
| H | 1.83446900  | 3.14548300  | -1.73856100 |
| H | 1.34652500  | 4.59973700  | -0.82022500 |
| H | 0.65525900  | 2.79126600  | 2.41739200  |
| H | -0.55592200 | 2.96146000  | 1.12094800  |
| H | 0.47684400  | 4.34790100  | 1.55275400  |
| H | 2.94917600  | 3.00628900  | 1.99202900  |
| H | 5.04264100  | 1.30974500  | -1.32970000 |
| H | 5.29033200  | 2.97119400  | -0.74233300 |
| H | 3.84584600  | 2.57898200  | -1.70293200 |
| H | 5.35725700  | 0.49749400  | 1.06637500  |
| H | 4.39620300  | 1.23746800  | 2.37850500  |
| H | 5.60610500  | 2.20489900  | 1.50663800  |
| H | 3.46053900  | -2.84237100 | -2.54925600 |
| H | 3.63489000  | -4.36945900 | -0.60615900 |
| H | 3.28400800  | -3.49769000 | 1.68593800  |
| H | 2.60395200  | 0.10528200  | 2.45144200  |

|   |            |             |             |
|---|------------|-------------|-------------|
| H | 3.34268600 | 3.99906900  | 0.57195800  |
| H | 1.54972900 | -2.69786200 | 3.10764700  |
| H | 0.60264800 | -1.38452000 | 2.37340500  |
| H | 1.23690200 | -1.20701300 | 4.02844600  |
| H | 4.03772300 | -2.38700800 | 3.55494900  |
| H | 3.74391100 | -0.86538700 | 4.41959000  |
| H | 4.87407900 | -0.90708400 | 3.04124800  |
| H | 2.74473400 | 0.81948300  | -2.24206000 |
| H | 5.02253300 | 0.02558500  | -3.05938200 |
| H | 3.91672700 | 0.45924700  | -4.38687100 |
| H | 4.20716400 | -1.24592700 | -3.99202400 |
| H | 1.69906600 | -1.66363000 | -3.70429900 |
| H | 1.40528200 | 0.03380300  | -4.16136300 |
| H | 0.73896900 | -0.61363600 | -2.64102300 |

## References

- S1 O. V. Dolomanov, L. J. Bourhis, R. J. Gildea, J. A. K. Howard and H. Puschmann, *J. Appl. Cryst.*, 2009, **42**, 339-341.
- S2 G. M. Sheldrick, *Acta Cryst.*, 2015, **A71**, 3-8.
- S3 G. M. Sheldrick, *Acta Cryst.*, 2015, **C71**, 3-8.
- S4 Y. Zhao and D. G. Truhlar, *Theor. Chim. Acta*, 2008, **120**, 215–241.
- S5 Y. Zhao and D. G. Truhlar, *Acc. Chem. Res.*, 2008, **41**, 157–167.
- S6 J. P. Perdew, K. Burke and M. Ernzerhof, *Phys. Rev. Lett.*, 1996, **77**, 3865-3868.
- S7 A. D. Becke, *J. Chem. Phys.*, 1993, **98**, 1372-1377.
- S8 C. Lee, W. Yang and R. G. Parr, *Phys. Rev. B*, 1988, **37**, 785–789.
- S9 B. Miehlich, A. Savin, H. Stoll and H. Preuss, *Chem. Phys. Lett.*, 1989, **157**, 200–206.
- S10 S. Grimme, S. Ehrlich and L. Goerigk, *J. Comput. Chem.*, 2011, **32**, 1456–1465.
- S11 S. Grimme, J. Antony, S. Ehrlich and H. Krieg, *J. Chem. Phys.*, 2010, **132**, 154104–154123.
- S12 S. Grimme, *J. Comput. Chem.*, 2004, **25**, 1463–1476.
- S13 S. Grimme, *J. Comput. Chem.*, 2006, **27**, 1787–1799.
- S14 A. Schafer, H. Horn and R. Ahlrichs, *J. Chem. Phys.*, 1992, **97**, 2571-2577.
- S15 F. Weigend, M. Haser, H. Patzelt and R. Ahlrichs, *Chem. Phys. Lett.*, 1998, **294**, 143-152.
- S16 Gaussian 16, Revision A.03, M. J. Frisch, G. W. Trucks, H. B. Schlegel, G. E. Scuseria, M. A. Robb, J. R. Cheeseman, G. Scalmani, V. Barone, G. A. Petersson, H. Nakatsuji, X. Li,

M. Caricato, A. V. Marenich, J. Bloino, B. G. Janesko, R. Gomperts, B. Mennucci, H. P. Hratchian, J. V. Ortiz, A. F. Izmaylov, J. L. Williams, F. Ding, F. Lipparini, F. Egidi, J. Goings, B. Peng, A. Petrone, T. Henderson, D. Ranasinghe, V. G. Zakrzewski, J. Gao, N. Rega, G. Zheng, W. Liang, M. Hada, M. Ehara, K. Toyota, R. Fukuda, J. Hasegawa, M. Ishida, T. Nakajima, Y. Honda, O. Kitao, H. Nakai, T. Vreven, K. Throssell, J. A. Montgomery Jr., J. E. Peralta, F. Ogliaro, M. J. Bearpark, J. J. Heyd, E. N. Brothers, K. N. Kudin, V. N. Staroverov, T. A. Keith, R. Kobayashi, J. Normand, K. Raghavachari, A. P. Rendell, J. C. Burant, S. S. Iyengar, J. Tomasi, M. Cossi, J. M. Millam, M. Klene, C. Adamo, R. Cammi, J. W. Ochterski, R. L. Martin, K. Morokuma, O. Farkas, J. B. Foresman and D. J. Fox, Gaussian, Inc., Wallingford CT, 2016
